# Supplementary material for: Paclobutrazol Ameliorates Low-Light-Induced Damage by Improving Photosynthesis, Antioxidant Defense System, and Regulating Hormone Levels in Tall Fescue
Source: MDPI journal article supplement (doi:10.3390/ijms23179966), 2022-09-01
Supplement: s1 [file s1]

**Table S1**

Sequences of primers used in quantitative real-time PCR (qRT-PCR) test.

| Gene name         | Forward primer (5' to 3') | Reverse primer (5' to 3')  |
|-------------------|---------------------------|----------------------------|
| <i>FaActin</i>    | TCTTACCGAGAGAGGTTACTCC    | CCAGCTCCTGTTTCATAGTCAAG    |
| <i>FaKS</i>       | ACGGAAGGCTAGAATAAGGAAGCA  | TCGTAGTCCTCTCCTGATATGCTCC  |
| <i>FaKO</i>       | TGTTCCCGGTTTACCGCTTATT    | GCTGAGTTGAGCACAGCTACAGATG  |
| <i>FaKAO</i>      | CTTCCTCCGCGCCTTCAAGT      | TGTCACTACCATGATCGTCGGG     |
| <i>FaGA20ox</i>   | TCAACATCGGCGACACATTTCAT   | CAGAGGAAGTAAGCCAGCGACC     |
| <i>FaGA2ox</i>    | GATGTGACGCAGGAGGTAGCGA    | TTCAGCCGGAGGAAGCACGT       |
| <i>FaPYR1</i>     | TACAAGCACTTCATCCGCAGCT    | GGTGATGGTGAAGCCGAAGG       |
| <i>FaPYL1</i>     | ACTTCATCAAGTCCTGCGACCTC   | GACGACGCTGAAGCTGAGGAT      |
| <i>FaNCED1</i>    | CTCTTCGACGGTGACGGCAT      | TGAAAGCCGGAGAAGACGTTG      |
| <i>FaMn-SOD</i>   | CACCTACGTTGCCAACTACAACAAG | CTCATTAGCAGGCTTGAGGTTCTTC  |
| <i>FaCuZn-SOD</i> | TCAACTGGGTACACCGAGGTGA    | TCGTTTCAGTATCAATAGGTGCTCCA |
| <i>FaPOD2</i>     | CATGGGAAGAAAGTGGTCATCTTC  | CTGCCCATCCGTTGAGAACATA     |
| <i>FaCAT1</i>     | CGATCCTGCTTGAGGACTACCAC   | GTCGTGGGTACCTCGAAGAAG      |
| <i>FaAPX7</i>     | ATGGCACGATTCTGGCACATAT    | GCCAACTGGAATAAATCTGCGTA    |
| <i>FaGR</i>       | GGTAGGCCATCAATGCCAAATAT   | GCCGAATAAACACATGAACCTCA    |
| <i>FaMDHAR5</i>   | CGGCTGGAATCTTGACACAACCT   | TCAGAGCCAGCATCAAGTTTGTC    |
| <i>FaDHAR2</i>    | CAGGCACTCGATGAGCACCTA     | GTGTAGGCATAGACGCTGGTCAG    |
